# Supplementary material
Source: PubMed Central journal article supplement (PMC7817395)
Supplement: mmc1.pdf [file mmc1.pdf]

## **MODEL STRUCTURE**

The model (Figure 1, main text) advances in discrete, 1-day time steps for 2.5 years (the longest epidemic duration across scenarios included in this study). On any given day, each individual in the model is in 1 of 5 mutually exclusive COVID-19 coronavirus compartments: (1) susceptible (S, not infected and able to become infected), (2) exposed (E, infected, but not able to transmit to others), (3) infectious and asymptomatic ( $I_a$ , infected, but without symptoms, and able to transmit to others), (4) infectious and symptomatic ( $I_s$ , infected, showing symptoms, and able to transmit to others), or (5) recovered/immune (R, not infected and unable to become infected). On day 1, a set number of individuals start in the ' $I_a$ ' and ' $I_s$ ' compartments (i.e., seed coronavirus); the remainder start in the 'S' compartment. Each day, individuals interact with each other randomly, and an infectious person can potentially transmit the virus to a susceptible person. If a susceptible person comes in contact with an infectious person, he/she moves from the 'S' to the 'E' compartment. The following equation determines the number of susceptible individuals who became exposed each day:  $\beta * S * I_s + \beta * S * I_a$ . Beta ( $\beta$ ) is a function of the basic reproduction number ( $R_0$ ; the average number of secondary cases generated by 1 infectious case) divided by the infectious period duration and the number of individuals in the population, 'S' and 'I' represent the number of susceptible and infectious persons, respectively, on any given day. Exposed individuals remain in the 'E' compartment for the latent period duration (i.e., time between exposure and ability to transmit) before becoming infectious and moving to the 'I' compartment (at the rate of  $1/\text{latent period duration}$ ). As individuals can transmit the virus prior to disease onset,<sup>1</sup> they could transmit 1 day prior to symptom onset. Each individual moving to the 'I' compartment has a probability of being symptomatic, which governs if they are in the ' $I_s$ ' or ' $I_a$ ' compartment. Each person draws an infectious period duration from a distribution (range:

**Appendix**  
**The Benefits of Vaccinating With the First Available COVID-19 Coronavirus Vaccine**  
**Bartsch et al.**

4–15 days, including the day prior to symptom onset). Infectious individuals remain in the ‘I state’ until they recover and are no longer infectious, moving from the ‘I’ to the ‘R’ compartment (at the rate of  $1/\text{infectious period duration}$ ), where they remained for the rest of the simulation.

Each symptomatically infected person (i.e., COVID-19 case, regardless of formal diagnosis) travels through a probability tree of different sequential age-specific outcomes.<sup>2,3</sup> An infected person showing symptoms starts with a mild infection and has a probability of either seeking ambulatory care or calling his/her physician. This person then has a probability of progressing to severe disease requiring hospitalization (regardless of ambulatory care or telephone consult). If this person has only mild illness and is not hospitalized, he/she self-treats with over-the-counter medications and misses productivity days. If this person is hospitalized, he/she has a probability of developing severe pneumonia or severe non-pneumonia symptoms and has a probability of intensive care unit admission. This patient then has a probability of having either sepsis or acute respiratory distress syndrome (ARDS), with or without sepsis. If this patient has ARDS, he/she requires the use of a ventilator. If the person is hospitalized, he/she has a probability of dying. The person accrues relevant costs and health effects as he/she travels through the model.

## **DATA SOURCES**

Appendix Table 1 shows key model input parameters, values, and sources. All costs, clinical probabilities, and durations were age-specific when available and come from scientific literature or nationally representative data sources [e.g., Healthcare Cost and Utilization Project (HCUP), Centers for Medicare and Medicaid Services (CMS)]. In the absence of literature, data from the Centers for Disease Control and Prevention (CDC) was preferred. Age-specific COVID-19 data

**Appendix**  
**The Benefits of Vaccinating With the First Available COVID-19 Coronavirus Vaccine**  
**Bartsch et al.**

are specific to the U.S. context as of May 30, 2020 and come from the CDC.<sup>4</sup> When multiple sources were used for a parameter value (e.g., health state utility, probability of ARDS), input values are the average and standard deviation or median and range across reported values. In the absence of specific data, the probability of diagnosis given symptoms, derived from seroprevalence surveys and case reports, served as a proxy for the probability of seeking ambulatory care for symptoms.<sup>5</sup> Utility weights, derived from sources using preference-based measures, accounted effects on the quality of life but not for effects on productivity. All costs are reported in 2020 values, inflating all past and discounting all future costs using a 3% annual rate. As cost data come from several sources published across different years, we utilized a standard 3% rate to inflate all past costs, regardless of year, to 2020 values, per recommendations from the Panel of Cost-Effectiveness in Health and Medicine.<sup>6,7</sup> We also explored the impact of using a daily discount rate.

## **MODEL CALIBRATION AND VALIDATION**

We parameterized the number of individuals starting in the ‘Ia state’ and ‘Is state’ on day 1 (i.e., coronavirus seed) such that simulated cases reflected case data reported as of March 24, 2020<sup>8</sup> for any given  $R_0$  drawn from the distribution, and an epidemic occurred. This was equivalent to 130 symptomatic cases and 70 asymptomatic cases, which has a ratio of symptomatic to asymptomatic persons based on the probability of having symptoms. As predicting the specific course of the current pandemic can be challenging with such variations in the application of social distancing measures and face mask use policies as well as variations in the types and efficacy of face masks, we simulated general non-pharmaceutical intervention (NPI) use. We parameterized NPI effectiveness (i.e., combination of efficacy of NPIs and compliance with

**Appendix**  
**The Benefits of Vaccinating With the First Available COVID-19 Coronavirus Vaccine**  
**Bartsch et al.**

NPIs) such that (in the absence of vaccination) the simulated prevalent cases reflected the reported number of prevalent cases as of October 8, 2020,<sup>9</sup> simulated over a similar duration. This was equivalent to an effectiveness of 0.3825, which generated 7,554,912 prevalent cases in the model by day 242, which corresponds to the reported 7,583,200 prevalent cases based on total SARS-CoV-2 case counts.

We also performed model validation including face validity and criterion validity. We achieved face validity as the progression of the simulated unmitigated epidemic proceeded in a trend following widely accepted epidemiological trends. For example, the peak number of cases per day (e.g., the peak of the epidemic curve) occurred when the population achieved herd immunity, which aligns with previously demonstrated trends in population infection control. For criterion validation, we compared the number of simulated age-stratified infections with and without NPIs to CDC age-stratified data from day 246. Day 246 corresponds to the most recent date of available COVID-19 data from the CDC (October 12, 2020<sup>10,11</sup>), assuming that community spread began in the U.S. at the beginning of February. Appendix Table 2 shows the age-stratified simulated data compared to the available CDC data. To note, there are a number of limitations to the CDC data when making comparisons. The hospitalization and ICU admission data have many missing data points (including all data for ages 80+) and has a 15-day lag. Additionally, an overall limitation of surveillance data is the inability to capture the cases in individuals who do not seek testing. Given these limitations, we expect there to be some discrepancy between model simulated data and CDC reported data, but the overall trends and patterns hold. To note, results for this study are based on comparisons between modeled scenarios (e.g., cases averted when varying timing of vaccination onset and vaccine efficacy).

## **RESULTS OF SENSITIVITY ANALYSES**

Overall, the duration of the infectious period, followed by vaccine efficacy and vaccination coverage are the largest drivers of total cases and third-party payer costs when vaccinating (Appendix Figure 1). Hourly wage, then vaccine efficacy, followed by the duration of infectiousness are the largest drivers of total societal costs when vaccinating.

While changes in coverage does not affect the situations in which waiting reduces total cases and costs, the magnitude of impact between vaccination scenarios changes (Appendix Figure 2). For example, if there is a vaccine with a 50% efficacy when 10% of the population have been infected, waiting until 40% are infected for an 80% efficacy results 1.95 million additional cases with a 25% coverage and 23.3 million more with a 75% coverage. Varying vaccination cost had little impact on total costs as vaccination costs are a small fraction of total costs compared to COVID-19 medical costs (e.g.,  $\pm$ \$40 in vaccination cost varies total third-party payer costs by -2.7% to 3% and total societal costs by -1.1% to 2.4%; Appendix Figure 3). Ambulatory care had little impact on direct medical costs due to illness (e.g., vaccinating with 20% vaccine efficacy when 25% have been infected results in \$277.8 billion when patients can seek ambulatory care and \$275.7 billion when all have a telephone consult).

Applying a daily discount rate had little impact on the resulting savings garnered by vaccinating with the first available vaccine. For example, if there is a 35% efficacious vaccine when 20% have been infected, waiting until 45% are infected for a vaccine with a 50% efficacy results in \$14.1 billion more in direct medical costs and \$13.9 billion more in productivity losses

**Appendix**  
**The Benefits of Vaccinating With the First Available COVID-19 Coronavirus Vaccine**  
**Bartsch et al.**

(compared to \$14.2 billion and \$14.0 billion more respectively when discounting annually). As another example, if there is a vaccine with a 50% efficacy available when 25% of the population have been infected, waiting until 50% become infected for an 80% efficacious vaccine results in \$21.3 billion more in direct medical costs and \$18.5 billion more in productivity losses (compared to \$21.7 billion and \$18.8 billion more with discounting annually). Given the high variability of when cases show symptoms, seek care, and may be hospitalized and that costs will accrue on different days based on this, we use an annual discount rate for all presented results.

**Appendix**  
**The Benefits of Vaccinating With the First Available COVID-19 Coronavirus Vaccine**  
**Bartsch et al.**

**Appendix Table 1.** Model Input Parameters, Values, and Sources

| Parameter                                                        | Distribution type | Mean or median | SE or range                 | Source |
|------------------------------------------------------------------|-------------------|----------------|-----------------------------|--------|
| COVID-19 coronavirus transmission                                |                   |                |                             |        |
| R <sub>0</sub>                                                   | Triangular        | 2.5            | 2.0–3.5                     | 12–15  |
| Latent period (days)                                             | Triangular        | 5.2            | 4.1–7.0                     | 12     |
| Infectious period (days)                                         | Uniform           | –              | 3–14                        | 16–19  |
| Costs (2020 US\$)                                                |                   |                |                             |        |
| Annual wages (all occupations)                                   | Beta Pert         | 40,993         | 21,950–104,403 <sup>a</sup> | 20     |
| Ambulatory care visit                                            | Uniform           |                | 110.43–148.33               | 21     |
| Telephone consult                                                | Point estimate    | 14.80          | –                           | 22     |
| Over the counter medications, daily                              |                   |                |                             |        |
| 0–12 years old <sup>b</sup>                                      | Gamma             | 3.87           | 2.10                        | 23     |
| ≥13 years old <sup>c</sup>                                       | Gamma             | 0.46           | 0.17                        | 23     |
| Hospitalization for pneumonia <sup>d</sup>                       |                   |                |                             |        |
| 0–17 years old                                                   | Gamma             | 12,502.30      | 1,508.04                    | 24     |
| 18–44 years old                                                  | Gamma             | 10,627.15      | 1,045.06                    | 24     |
| 45–64 years old                                                  | Gamma             | 13,718.14      | 1,238.76                    | 24     |
| 65–84 years old                                                  | Gamma             | 12,264.39      | 478.40                      | 24     |
| ≥85 years old                                                    | Gamma             | 10,982.73      | 518.29                      | 24     |
| Hospitalization for severe non-pneumonia (all ages) <sup>e</sup> | Gamma             | 6,886.53       | 1,182.99                    | 24     |
| Hospitalization for sepsis <sup>f</sup>                          |                   |                |                             |        |
| 0–17 years old <sup>g</sup>                                      | Gamma             | 22,694.30      | 1,861.33                    | 24     |
| 18–44 years old                                                  | Gamma             | 43,778.39      | 5,382.40                    | 24     |
| 45–64 years old                                                  | Gamma             | 38,734.24      | 2,725.10                    | 24     |
| 65–84 years old                                                  | Gamma             | 30,308.29      | 1,367.91                    | 24     |
| ≥85 years old                                                    | Gamma             | 22,694.30      | 1,861.33                    | 24     |
| Hospitalization for ARDS <sup>h</sup>                            |                   |                |                             |        |

**Appendix**  
**The Benefits of Vaccinating With the First Available COVID-19 Coronavirus Vaccine**  
**Bartsch et al.**

|                                                                |                |                                  |                                |            |
|----------------------------------------------------------------|----------------|----------------------------------|--------------------------------|------------|
| 0–17 years old                                                 | Gamma          | 42,350.58                        | 4,198.97                       | 24         |
| 18–44 years old                                                | Gamma          | 26,210.96                        | 1,558.61                       | 24         |
| 45–64 years old                                                | Gamma          | 19,863.98                        | 453.92                         | 24         |
| 65–84 years old                                                | Gamma          | 18,718.55                        | 335.69                         | 24         |
| ≥85 years old                                                  | Gamma          | 16,559.75                        | 754.12                         | 24         |
| Hospitalization for Guillain-Barre Syndrome <sup>i</sup>       | Gamma          | 39,953.81                        | 1,122.69                       | 24         |
| Hospitalization for allergic reaction/anaphylaxis <sup>j</sup> | Triangular     | 7,527.55                         | 6,774.80–8,280.31 <sup>k</sup> | 24         |
| <b>Probabilities</b>                                           |                |                                  |                                |            |
| Non-pharmaceutical intervention (NPI) effectiveness            | Point estimate | 0.3825                           | –                              | Calibrated |
| <b>Side effects due to vaccination</b>                         |                |                                  |                                |            |
| Minor                                                          | Uniform        | –                                | 0.33–0.42                      | 25–27      |
| Severe: Guillain-Barre Syndrome <sup>l</sup>                   | Uniform        | –                                | 0.000001–0.000003              | 28         |
| Severe: allergic reaction/anaphylaxis <sup>l</sup>             | Triangular     | 0.0000015                        | 0.0000009–0.0000025            | 29         |
| Asymptomatic infection                                         | Triangular     | 0.35                             | 0.315–0.385 <sup>k</sup>       | 15         |
| Relative infectiousness of asymptomatic infection              | Point estimate | 1                                | –                              | 15         |
| Missing work/school                                            | Point estimate | 1.0                              | –                              | Assumption |
| Ambulatory care                                                | Triangular     | 0.15                             | 0.06–0.26                      | 5          |
| Telephone consult                                              | –              | 1-probability of ambulatory care | –                              | Assumption |
| <b>Hospitalization, given infection</b>                        |                |                                  |                                |            |
| 0–17 years old                                                 | Beta pert      | 0.031                            | 0.028–0.034 <sup>k</sup>       | 4          |
| 18–44 years old                                                | Beta pert      | 0.056                            | 0.051–0.062 <sup>k</sup>       | 4          |
| 45–64 years old                                                | Beta pert      | 0.140                            | 0.126–0.154 <sup>k</sup>       | 4          |
| ≥65 years old                                                  | Beta pert      | 0.300                            | 0.270–0.330 <sup>k</sup>       | 4          |



**Appendix**  
**The Benefits of Vaccinating With the First Available COVID-19 Coronavirus Vaccine**  
**Bartsch et al.**

|                                                  |                |       |                            |                         |
|--------------------------------------------------|----------------|-------|----------------------------|-------------------------|
| ICU admission, given hospitalization             |                |       |                            |                         |
| 0–17 years old                                   | Beta pert      | 0.171 | 0.154–0.1881 <sup>k</sup>  | 4                       |
| 18–44 years old                                  | Beta pert      | 0.152 | 0.137–0.1675 <sup>k</sup>  | 4                       |
| 45–64 years old                                  | Beta pert      | 0.186 | 0.168–0.2047 <sup>k</sup>  | 4                       |
| ≥65 years old                                    | Beta pert      | 0.148 | 0.133–0.163 <sup>k</sup>   | 4                       |
| Mortality, given hospitalization                 |                |       |                            |                         |
| 0–17 years old                                   | Uniform        | –     | 0.0054–0.0215 <sup>l</sup> | 4                       |
| 18–44 years old                                  | Uniform        | –     | 0.0186–0.0745 <sup>l</sup> | 4                       |
| 45–64 years old                                  | Uniform        | –     | 0.0519–0.2076 <sup>l</sup> | 4                       |
| ≥65 years old                                    | Uniform        | –     | 0.1517–0.6068 <sup>l</sup> | 4                       |
| Pneumonia, given hospitalization                 | Beta           | 0.79  | 0.711–0.869 <sup>m</sup>   | 30                      |
| ARDS, requiring ventilator use in ICU            | Beta           | 0.771 | 0.053                      | 31–35                   |
| Age-group, given infection                       |                |       |                            |                         |
| 0–17 years old                                   | Point estimate | 0.05  | –                          | 4                       |
| 18–44 years old                                  | Point estimate | 0.39  | –                          | 4                       |
| 45–64 years old                                  | Point estimate | 0.33  | –                          | 4                       |
| ≥65 years old                                    | Point estimate | 0.23  | –                          | 4                       |
| Durations (days)                                 |                |       |                            |                         |
| Minor side effects                               | Uniform        | –     | 1–2                        | Assumption <sup>n</sup> |
| Ambulatory care                                  | Point estimate | 0.5   | –                          | Assumption              |
| Duration of symptoms with mild illness           | Triangular     | 7     | 3–17                       | 18,36,37                |
| Duration of symptoms prior to hospital admission | Triangular     | 7     | 3–9 <sup>o</sup>           | 38,39                   |
| Hospitalization, not admitted to ICU             |                |       |                            |                         |
| 0–49 years old                                   | Gamma          | 3.9   | 3.7                        | 15                      |
| 50–64 years old                                  | Gamma          | 4.9   | 4.3                        | 15                      |
| ≥65 years old                                    | Gamma          | 6.2   | 5.7                        | 15                      |
| Hospitalization, ICU (all ages)                  | Gamma          | 9     | 4–17 <sup>m</sup>          | 33–35,40                |
| Hospitalization, ventilator use                  | Gamma          | 9     | 5–12 <sup>m</sup>          | 33,34,41                |

**Appendix**  
**The Benefits of Vaccinating With the First Available COVID-19 Coronavirus Vaccine**  
**Bartsch et al.**

|                                                             |                |                          |           |                             |
|-------------------------------------------------------------|----------------|--------------------------|-----------|-----------------------------|
| Hospitalization, Guillain-Barre Syndrome <sup>i</sup>       | Gamma          | 11.5                     | 0.33      | 24                          |
| Hospitalization, allergic reaction/anaphylaxis <sup>j</sup> | Gamma          | 2.3                      | 2.1–2.5   | 24                          |
| <b>Utility weights</b>                                      |                |                          |           |                             |
| <b>Healthy QALY</b>                                         |                |                          |           |                             |
| <17 years old                                               | Point estimate | 1                        | –         | 42                          |
| 18–64 years old                                             | Point estimate | 0.92                     | –         | 42                          |
| ≥65 years old                                               | Point estimate | 0.84                     | –         | 42                          |
| Mild non-specific symptoms <sup>p</sup>                     | Beta           | 0.648                    | 0.103     | 43–52                       |
| Hospitalized, non-pneumonia symptoms <sup>q</sup>           | Beta           | 0.514                    | 0.089     | 45,52,53                    |
| Pneumonia                                                   | Beta           | 0.496                    | 0.17      | 54–58                       |
| Sepsis                                                      | Beta           | 0.467                    | 0.18      | 58–64                       |
| ARDS                                                        | Triangular     | 0.10                     | 0.08–0.15 | 65                          |
| <b>Sensitivity analyses</b>                                 |                |                          |           |                             |
| <b>Parameter</b>                                            |                | <b>Values</b>            |           | <b>Source</b>               |
| Vaccine efficacy                                            |                | 20%–80%                  |           | Assumption                  |
| Percent of population exposed prior to vaccination onset    |                | 5%–50%                   |           | Assumption                  |
| Vaccination coverage                                        |                | 25%–75%                  |           | Assumption                  |
| Vaccination cost                                            |                | \$45–\$125               |           | Assumption <sup>66,67</sup> |
| NPI use                                                     |                | No, Yes                  |           | Assumption                  |
| Probability of ambulatory care                              |                | Baseline distribution–0% |           | Assumption <sup>5</sup>     |

<sup>a</sup>Values are 95% CI.

<sup>b</sup>Assumes 5 to 10 mg/kg of ibuprofen orally every 6 to 8 hours as needed OR 10 to 15 mg/kg of acetaminophen orally every 4 to 6 hours as needed.

<sup>c</sup>Assumes 200 mg of ibuprofen or acetaminophen orally every 4 to 6 hours as needed.

<sup>d</sup>Uses ICD-10 code #J13 Pneumonia due to *Streptococcus pneumoniae*.

<sup>e</sup>Uses ICD-10 code #J11.89 Influenza due to unidentified influenza virus with other manifestations.

<sup>f</sup>Uses ICD-10 code #R65.21 Severe sepsis with septic shock.

<sup>g</sup>Data for age-group unavailable and uses lowest values of all age-groups as a proxy.

**Appendix**  
**The Benefits of Vaccinating With the First Available COVID-19 Coronavirus Vaccine**  
**Bartsch et al.**

<sup>h</sup>Uses ICD-10 code #J96.22 Acute and chronic respiratory failure with hypercapnia for 18 years and older and ICD-10 code #J96.20 Acute and chronic respiratory failure, unspecified whether with hypoxia or hypercapnia for 0 to 17-year olds.

<sup>i</sup>Uses ICD-10 code #G61.0 Guillain-Barre syndrome.

<sup>j</sup>Uses ICD-10 code #T78.2 Anaphylactic shock, unspecified.

<sup>k</sup>Values are a relative +/- 10% of the mean or median value.

<sup>l</sup>Maximum value is value reported in data, minimum value is a relative 75% reduction of the reported value.

<sup>m</sup>Values are IQR.

<sup>n</sup>Uses data from influenza vaccinations as a proxy.

<sup>o</sup>Values are 10%–90%.

<sup>p</sup>Uses influenza without hospitalization as a proxy.

<sup>q</sup>Uses influenza with hospitalization as a proxy.

ICU, intensive care unit; ARDS, acute respiratory distress syndrome; QALY, quality adjusted life year.

**Appendix**  
**The Benefits of Vaccinating With the First Available COVID-19 Coronavirus Vaccine**  
**Bartsch et al.**

**Appendix Table 2.** Number of Model-Generated Clinical Outcomes and CDC Reported Data Through Day 246

| Variable                                                                             | SARS-CoV-2 infections | Symptomatic cases | Mild infections | Hospitalizations <sup>b</sup> | Intensive care unit stays <sup>b</sup> | Number deaths |
|--------------------------------------------------------------------------------------|-----------------------|-------------------|-----------------|-------------------------------|----------------------------------------|---------------|
| Model-generated outcomes                                                             |                       |                   |                 |                               |                                        |               |
| Unmitigated pandemic                                                                 |                       |                   |                 |                               |                                        |               |
| All ages                                                                             | 299,653,942           | 194,775,062       | 167,734,933     | 27,040,129                    | 4,372,271                              | 6,469,707     |
| 0 to 17 years                                                                        |                       | 9,738,753         | 9,439,897       | 298,856                       | 51,260                                 | 4,015         |
| 18 to 44 years                                                                       |                       | 75,962,274        | 71,671,373      | 4,290,901                     | 653,504                                | 199,781       |
| 45 to 64 years                                                                       |                       | 64,275,771        | 55,264,308      | 9,011,463                     | 1,677,033                              | 1,169,221     |
| ≥65 years                                                                            |                       | 44,798,264        | 31,359,355      | 13,438,909                    | 1,990,474                              | 5,096,691     |
| With non-pharmaceutical interventions (NPIs)                                         |                       |                   |                 |                               |                                        |               |
| All ages                                                                             | 7,855,478             | 5,106,060         | 4,397,199       | 708,861                       | 114,620                                | 169,604       |
| 0 to 17 years                                                                        |                       | 255,303           | 247,468         | 7,835                         | 1,344                                  | 105           |
| 18 to 44 years                                                                       |                       | 1,991,364         | 1,878,877       | 112,487                       | 17,132                                 | 5,237         |
| 45 to 64 years                                                                       |                       | 1,685,000         | 1,448,763       | 236,237                       | 43,964                                 | 30,651        |
| ≥65 years                                                                            |                       | 1,174,394         | 822,091         | 352,303                       | 52,181                                 | 133,611       |
| CDC reported data (note different age groups and for which missing data in reported) |                       |                   |                 |                               |                                        |               |
| Total <sup>a</sup>                                                                   | 7,787,548             |                   |                 |                               |                                        |               |
| 0 to 17 years                                                                        | 493,455               |                   |                 |                               |                                        | 96            |
| 18 to 49 years                                                                       | 3,121,724             |                   |                 |                               |                                        | 7,832         |
| 50 to 64 years                                                                       | 1,151,425             |                   |                 |                               |                                        | 24,013        |
| ≥65 years                                                                            | 840,858               |                   |                 |                               |                                        | 122,291       |
| 0 to 19 years                                                                        |                       |                   |                 | 209                           | 35                                     |               |
| 20 to 49 years                                                                       |                       |                   |                 | 33,459                        | 3,791                                  |               |
| 50 to 69 years                                                                       |                       |                   |                 | 78,907                        | 9,862                                  |               |
| 70-79 years                                                                          |                       |                   |                 | 11,936                        | 1,804                                  |               |

*Notes:* Cases and death counts reported by CDC as of October 12, 2020<sup>10</sup>; hospitalizations and ICU admissions reported by CDC through September 30, 2020.<sup>11</sup>

<sup>a</sup>Age group not available for 4% of cases.

<sup>b</sup>Hospitalizations/Intensive care unit stays: data not available for 80+; 922,846 missing/unknown data points for ICU stays; 487,404 missing/unknown data points for hospitalization. Questions that have been left unanswered (blank) on the case report form are re-

**Appendix**  
**The Benefits of Vaccinating With the First Available COVID-19 Coronavirus Vaccine**  
**Bartsch et al.**

classified to a Missing value, if applicable to the question. For example, in the question *Was the patient hospitalized?*, where the possible answer choices include *Yes*, *No*, or *Unknown*, the missing value is re-coded to Missing if the respondent did not answer the question.<sup>11</sup>

CDC, Centers for Disease Control and Prevention.

## Appendix The Benefits of Vaccinating With the First Available COVID-19 Coronavirus Vaccine Bartsch et al.

**Appendix Figure 1.** Impact of model parameters on (A) Total SARS-CoV-2 infections with a vaccine that prevents infection and NPIs implemented, (B) Total third-party payer costs with a vaccine that prevents infection and NPIs implemented, and (C) Total societal costs with a vaccine that prevents infection and NPIs implemented.

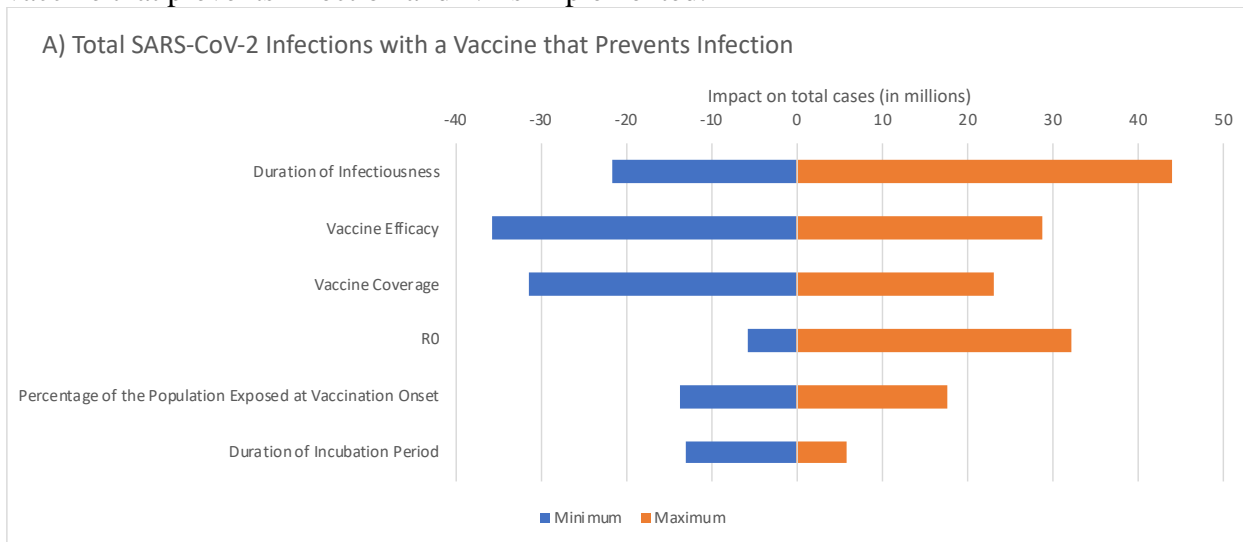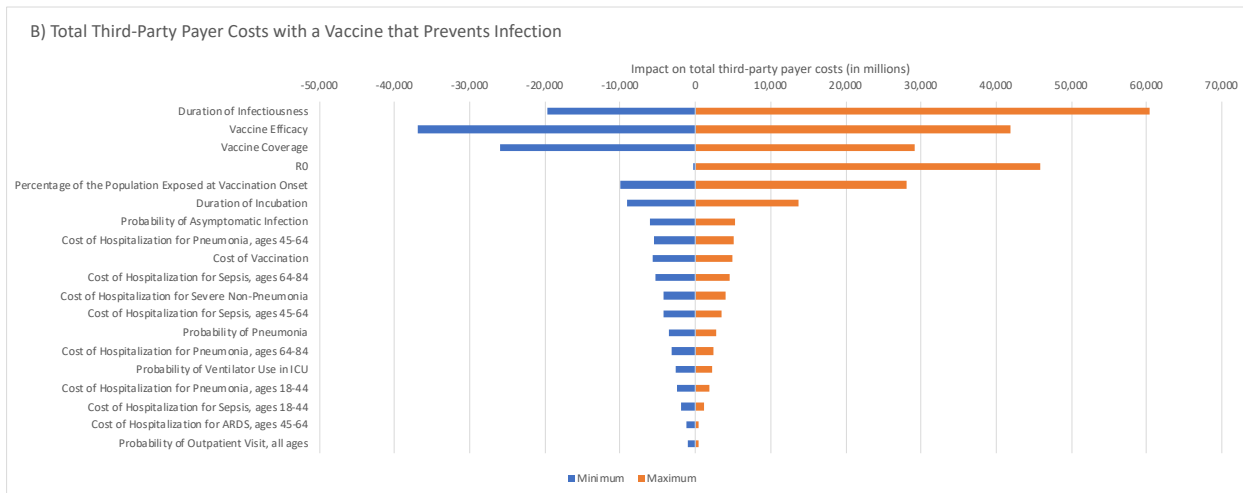

## Appendix

### The Benefits of Vaccinating With the First Available COVID-19 Coronavirus Vaccine

Bartsch et al.

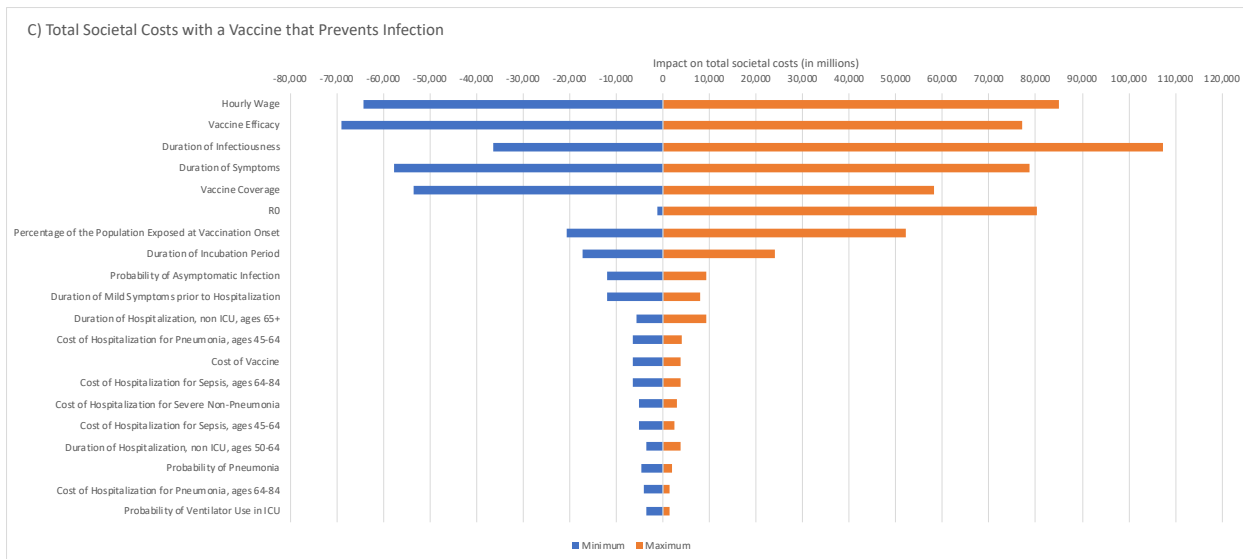

*Notes:* The x-axis shows the magnitude of the impact when parameters are varied to the minimum and maximum ends of their ranges; zero indicates the point for the target result at which all variables on the y-axis are held at their midpoint values. The width of the bar shows the range of impact that each parameter had when varied from its minimum to maximum value. To note, plots of total cases only include those parameters that affect this number (e.g., costs of hospitalization, etc. are not included) while plots of costs only include the top 20 parameters that impacted this value.

## Appendix The Benefits of Vaccinating With the First Available COVID-19 Coronavirus Vaccine Bartsch et al.

**Appendix Figure 2.** Impact of vaccine efficacy and timing of vaccination onset (percent of the population exposed to COVID-19 coronavirus prior to vaccination onset) on (A) the total number of COVID-19 coronavirus cases and (B) total third-party payer and societal costs during the course of the pandemic for a vaccine that prevents infection, varying with vaccination coverage (\$85 vaccination cost), when non-pharmaceutical interventions (NPIs) similar to current U.S. measures implemented.

### A. Total Number of COVID-19 Coronavirus Infections (With NPIs, Vaccine Prevents Infection and Viral Shedding)

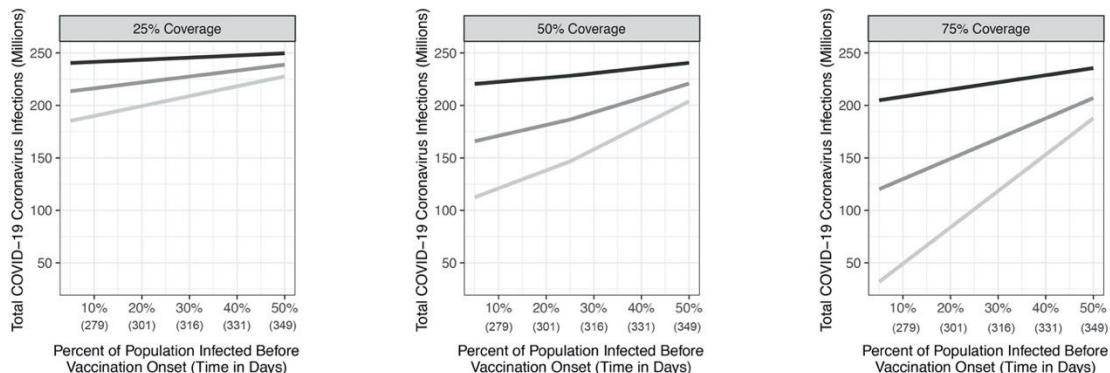

### B. Total Third-Party Payer and Societal Costs (With NPIs, Vaccine Prevents Infection and Viral Shedding)

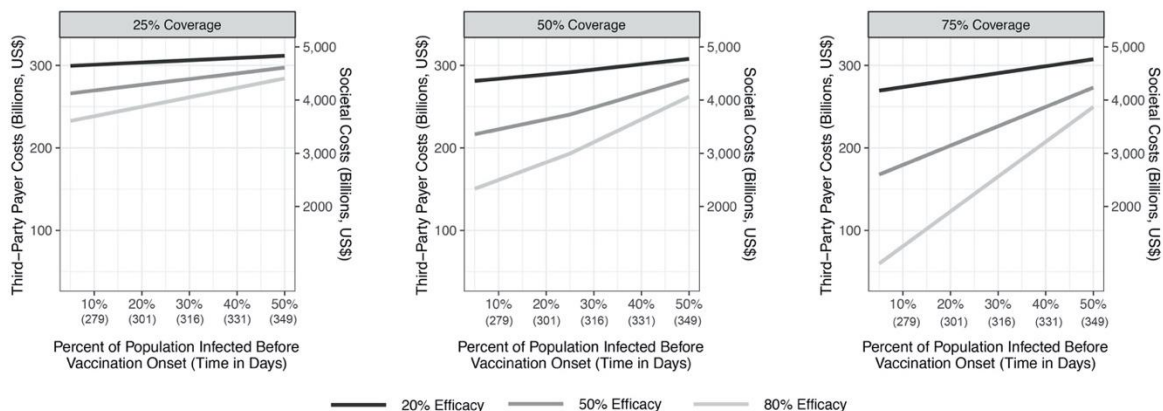

— 20% Efficacy    — 50% Efficacy    — 80% Efficacy



**Appendix**  
**The Benefits of Vaccinating With the First Available COVID-19 Coronavirus Vaccine**  
**Bartsch et al.**

**Appendix Figure 3.** Impact of vaccination cost and timing of vaccination onset (percent of the population exposed to COVID-19 coronavirus prior to vaccination onset) on total third-party payer and societal costs during the course of the pandemic for a vaccine that prevents infection, assuming 50% coverage, when non-pharmaceutical interventions (NPIs) similar to current U.S. measures implemented.

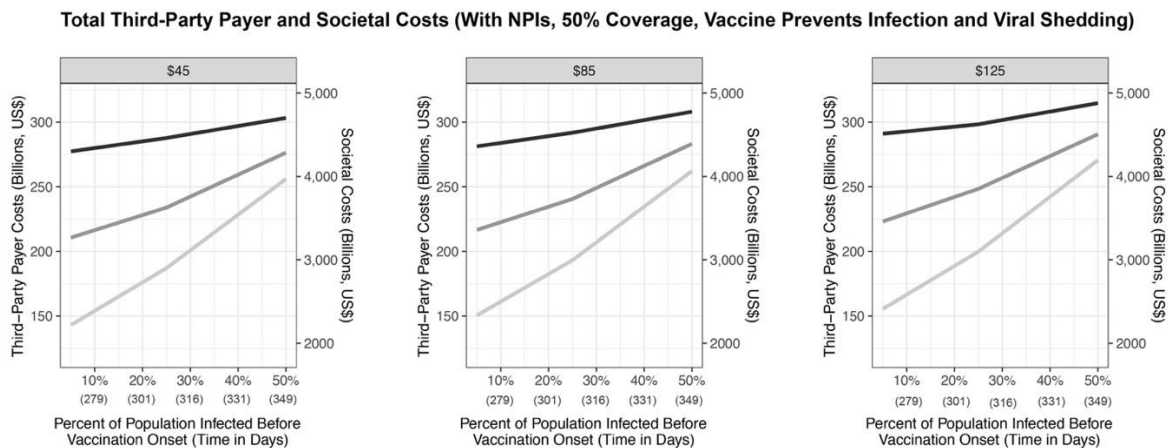

## REFERENCES

1. Rothe C, Schunk M, Sothmann P, et al. Transmission of 2019-nCoV infection from an asymptomatic contact in Germany. *New Engl J Med*. 2020;382(10):970–971.  
<https://doi.org/10.1056/nejmc2001468>.
2. Bartsch SM, O’Shea KJ, Ferguson MC, et al. Vaccine efficacy needed for a COVID-19 coronavirus vaccine to prevent or stop an epidemic as the sole intervention. *Am J Prev Med*. 2020;59(4):493–503. <https://doi.org/10.1016/j.amepre.2020.06.011>.
3. Bartsch SM, Ferguson MC, McKinnell JA, et al. The potential health care costs and resource use associated with COVID-19 in the United States. *Health Aff (Millwood)*. 2020;39(6):927–935. <https://doi.org/10.1377/hlthaff.2020.00426>.
4. Stokes EK, Zambrano LD, Anderson KN, et al. Coronavirus disease 2019 case surveillance - United States, January 22–May 30, 2020. *MMWR Morb Mortal Wkly Rep*. 2020;69(24):759–765. <https://doi.org/10.15585/mmwr.mm6924e2>.
5. Havers FP, Reed C, Lim T, et al. Seroprevalence of antibodies to SARS-CoV-2 in 10 sites in the United States, March 23–May 12, 2020. *JAMA Intern Med*. 2020;180(12):1576–1586. <https://doi.org/10.1001/jamainternmed.2020.4130>.
6. Weinstein MC, Siegel JE, Gold MR, Kamlet MS, Russell LB. Recommendations of the panel on cost-effectiveness in health and medicine. *JAMA*. 1996;276(15):1253–1258.  
<https://doi.org/10.1001/jama.1996.03540150055031>.
7. Sanders GD, Neumann PJ, Basu A, et al. Recommendations for conduct, methodological practices, and reporting of cost-effectiveness analyses: second panel on cost-effectiveness

**Appendix**  
**The Benefits of Vaccinating With the First Available COVID-19 Coronavirus Vaccine**  
**Bartsch et al.**

in health and medicine. *JAMA*. 2016;316(10):1093–1103.

<https://doi.org/10.1001/jama.2016.12195>.

8. Severe outcomes among patients with coronavirus disease 2019 (COVID-19) — United States, February 12–March 16, 2020. *MMWR Morb Mortal Wkly Rep*. 2020;69(12):343–346. <https://doi.org/10.15585/mmwr.mm6912e2>.
9. Centers for Disease Control and Prevention. United States COVID-19 Cases and Deaths by State over Time. <https://data.cdc.gov/Case-Surveillance/United-States-COVID-19-Cases-and-Deaths-by-State-o/9mfq-cb36>. Published October 8, 2020. Accessed October 12, 2020.
10. Centers for Disease Control and Prevention. Demographic Trends of COVID-19 cases and deaths in the US reported to CDC. <https://covid.cdc.gov/covid-data-tracker/#demographics>. Published October 12, 2020. Accessed October 12, 2020.
11. COVID-19 Case Surveillance Public Use Data. Centers for Disease Control and Prevention. <https://data.cdc.gov/Case-Surveillance/COVID-19-Case-Surveillance-Public-Use-Data/vbim-akqf>. Published September 30, 2020. Accessed October 12, 2020.
12. Li Q, Guan X, Wu P, et al. Early transmission dynamics in Wuhan, China, of novel coronavirus–infected pneumonia. *New Engl J Med*. 2020;382(13):1199–1207. <https://doi.org/10.1056/nejmoa2001316>.
13. Zhao S, Lin Q, Ran J, et al. Preliminary estimation of the basic reproduction number of novel coronavirus (2019-nCoV) in China, from 2019 to 2020: a data-driven analysis in the early phase of the outbreak. *Int J Infect Dis*. 2020;92:214–217. <https://doi.org/10.1016/j.ijid.2020.01.050>.

**Appendix**  
**The Benefits of Vaccinating With the First Available COVID-19 Coronavirus Vaccine**  
**Bartsch et al.**

14. Zhou T, Liu Q, Yang Z, et al. Preliminary prediction of the basic reproduction number of the Wuhan novel coronavirus 2019-nCoV. *J Evid Based Med*. 2020;13(1):3–7.  
<https://doi.org/10.1111/jebm.12376>.
15. COVID-19 Pandemic Planning Scenarios. Centers for Disease Control and Prevention.  
<https://www.cdc.gov/coronavirus/2019-ncov/hcp/planning-scenarios.html>. Published May 20, 2020. Accessed June 1, 2020.
16. Ling Y, Xu S, Lin Y, et al. Persistence and clearance of viral RNA in 2019 novel coronavirus disease rehabilitation patients. *Chin Med J (Engl)*. 2020;133(9):1039–1043.  
<https://doi.org/10.1097/cm9.0000000000000774>.
17. Wolfel R, Corman VM, Guggemos W, et al. Virological assessment of hospitalized patients with COVID-2019. *Nature*. 2020;581(7809):465–469.  
<https://doi.org/10.1038/s41586-020-2196-x>.
18. Chang, Mo G, Yuan X, et al. Time kinetics of viral clearance and resolution of symptoms in novel coronavirus infection. *Am J Respir Crit Care Med*. 2020;201(9):1150–1152.  
<https://doi.org/10.1164/rccm.202003-0524le>.
19. To KK, Tsang OT, Leung WS, et al. Temporal profiles of viral load in posterior oropharyngeal saliva samples and serum antibody responses during infection by SARS-CoV-2: an observational cohort study. *Lancet Infect Dis*. 2020;20(5):656–574.  
<https://doi.org/10.3410/f.737608898.793574123>.
20. Occupational employment statistics: May 2018 national occupational employment and wage estimates, United States. Bureau of Labor Statistics.  
[https://www.bls.gov/oes/2018/may/oes\\_nat.htm](https://www.bls.gov/oes/2018/may/oes_nat.htm). Published April 2, 2019. Accessed October 9, 2019.

**Appendix**  
**The Benefits of Vaccinating With the First Available COVID-19 Coronavirus Vaccine**  
**Bartsch et al.**

21. Physician Fee Schedule. Centers for Medicare & Medicaid Services.  
<https://www.cms.gov/apps/physician-fee-schedule/>. Published 2020. Accessed April 13, 2020.
22. innoviHealth Systems. Find-A-Code. <https://www.findacode.com>. Published 2020. Accessed April 3, 2020.
23. Walgreens Co. Price listing. <https://www.walgreens.com>. Published 2020. Accessed March 17, 2020.
24. HCUP facts and figures: statistics on hospital-based care in the United States. HHS.  
<https://hcupnet.ahrq.gov/#setup>. Published 2016. Accessed March 17, 2020.
25. Zhu FC, Guan XH, Li YH, et al. Immunogenicity and safety of a recombinant adenovirus type-5-vectored COVID-19 vaccine in healthy adults aged 18 years or older: a randomised, double-blind, placebo-controlled, phase 2 trial. *Lancet*. 2020;396(10249):479–488. [https://doi.org/10.1016/s0140-6736\(20\)31605-6](https://doi.org/10.1016/s0140-6736(20)31605-6).
26. Anderson EJ, Roupael NG, Widge AT, et al. Safety and immunogenicity of SARS-CoV-2 mRNA-1273 vaccine in older adults. *N Engl J Med*. 2020;383(25):2427–2438. <https://doi.org/10.1056/nejmoa2028436>.
27. Folegatti PM, Ewer KJ, Aley PK, et al. Safety and immunogenicity of the ChAdOx1 nCoV-19 vaccine against SARS-CoV-2: a preliminary report of a phase 1/2, single-blind, randomised controlled trial. *Lancet*. 2020;396(10249):467–478. <https://doi.org/10.3410/f.738355504.793576794>.
28. Breese J, Fry A, Sambhara S, Cox N. Inactivated Influenza Vaccine (Chapter 31). In: Plotkin S, Orentsein W, Offit P, Edwards K, eds. *Plotkin's Vaccines*, 7th Edition: Elsevier; 2018. <https://doi.org/10.1016/b978-0-323-35761-6.00031-6>.

**Appendix**  
**The Benefits of Vaccinating With the First Available COVID-19 Coronavirus Vaccine**  
**Bartsch et al.**

29. McNeil MM, DeStefano F. Vaccine-associated hypersensitivity. *J Allergy Clin Immunol*. 2018;141(2):463–472. <https://doi.org/10.1016/j.jaci.2017.12.971>.
30. Guan WJ, Ni ZY, Hu Y, et al. Clinical characteristics of coronavirus disease 2019 in China. *N Engl J Med*. 2020;382(18):1708–1720. <https://doi.org/10.1056/nejmoa2002032>.
31. Arentz M, Yim E, Klaff L, et al. Characteristics and outcomes of 21 critically ill patients with COVID-19 in Washington State. *JAMA*. 2020;323(16):1612–1614. <https://doi.org/10.1001/jama.2020.4326>.
32. Richardson S, Hirsch JS, Narasimhan M, et al. Presenting characteristics, comorbidities, and outcomes among 5700 patients hospitalized with COVID-19 in the New York City area. *JAMA*. 2020;323(20):2052–2059. <https://doi.org/10.3410/f.737797860.793574198>.
33. Gold JAW, Wong KK, Szablewski CM, et al. Characteristics and clinical outcomes of adult patients hospitalized with COVID-19 - Georgia, March 2020. *MMWR Morb Mortal Wkly Rep*. 2020;69(18):545–550. <https://doi.org/10.15585/mmwr.mm6918e1>.
34. Bhatraju PK, Ghassemieh BJ, Nichols M, et al. Covid-19 in critically ill patients in the Seattle region - case series. *N Engl J Med*. 2020;382(21):2012–2022. <https://doi.org/10.1056/nejmoa2004500>.
35. Auld SC, Caridi-Scheible M, Blum JM, et al. ICU and ventilator mortality among critically ill adults with coronavirus disease 2019. *Crit Care Med*. 2020;48(9):e799–e804. <https://doi.org/10.1097/ccm.0000000000004457>.
36. Arashiro T, Furukawa K, Nakamura A. COVID-19 in 2 persons with mild upper respiratory symptoms on a cruise ship, Japan. *Emerg Infect Dis*. 2020;26(6):1345–1348. <https://doi.org/10.3201/eid2606.200452>.

**Appendix**  
**The Benefits of Vaccinating With the First Available COVID-19 Coronavirus Vaccine**  
**Bartsch et al.**

37. Duszynski T. What does it mean to ‘recover from coronavirus’? Here’s what you need to know. *Science Alert*. April 11, 2020. <https://www.sciencealert.com/this-is-what-it-means-to-recover-from-corona-and-what-you-can-do-after>. Accessed January 8, 2021.
38. Garg S, Kim L, Whitaker M, et al. Hospitalization rates and characteristics of patients hospitalized with laboratory-confirmed coronavirus disease 2019 — COVID-NET, 14 states, March 1–30, 2020. *MMWR Morb Mortal Wkly Rep*. 2020;69(15):458–464. <https://doi.org/10.15585/mmwr.mm6915e3>.
39. Wang D, Hu B, Hu C, et al. Clinical characteristics of 138 hospitalized patients with 2019 novel coronavirus-infected pneumonia in Wuhan, China. *JAMA*. 2020;323(11):1061–1069. <https://doi.org/10.1001/jama.2020.1585>.
40. Lewnard JA, Liu VX, Jackson ML, et al. Incidence, clinical outcomes, and transmission dynamics of severe coronavirus disease 2019 in California and Washington: prospective cohort study. *BMJ*. 2020;369:m1923. <https://doi.org/10.1136/bmj.m1923>.
41. Imam Z, Odish F, Gill I, et al. Older age and comorbidity are independent mortality predictors in a large cohort of 1305 COVID-19 patients in Michigan, United States. *J Intern Med*. 2020;288(4):469–476. <https://doi.org/10.1111/joim.13119>.
42. Gold MR, Franks P, McCoy KI, Fryback DG. Toward consistency in cost-utility analyses: using national measures to create condition-specific values. *Med Care*. 1998;36(6):778–792. <https://doi.org/10.1097/00005650-199806000-00002>.
43. Smith KJ, Lee BY, Nowalk MP, Raymund M, Zimmerman RK. Cost-effectiveness of dual influenza and pneumococcal vaccination in 50-year-olds. *Vaccine*. 2010;28(48):7620–7625. <https://doi.org/10.1016/j.vaccine.2010.09.053>.

**Appendix**  
**The Benefits of Vaccinating With the First Available COVID-19 Coronavirus Vaccine**  
**Bartsch et al.**

44. Smith KJ, Roberts MS. Cost-effectiveness of newer treatment strategies for influenza. *Am J Med.* 2002;113(4):300–307. [https://doi.org/10.1016/s0002-9343\(02\)01222-6](https://doi.org/10.1016/s0002-9343(02)01222-6).
45. Rothberg MB, Rose DN. Vaccination versus treatment of influenza in working adults: a cost-effective analysis. *Am J Med.* 2005;118(1):68–77.  
<https://doi.org/10.1016/j.amjmed.2004.03.044>.
46. Khazeni N, Hutton DW, Garber AM, Hupert N, Owens DK. Effectiveness and cost-effectiveness of vaccination against pandemic influenza (H1N1) 2009. *Ann Intern Med.* 2009;151(12):829–839. <https://doi.org/10.7326/0000605-200912150-00157>.
47. Talbird SE, Brogan AJ, Winiarski AP, Sander B. Cost-effectiveness of treating influenzalike illness with oseltamivir in the United States. *Am J Health Syst Pharm.* 2009;66(5):469–480. <https://doi.org/10.2146/ajhp080296>.
48. Luce BR, Nichol KL, Belshe RB, et al. Cost-effectiveness of live attenuated influenza vaccine versus inactivated influenza vaccine among children ages 24–59 months in the United States. *Vaccine.* 2008;26(23):2841–2848.  
<https://doi.org/10.1016/j.vaccine.2008.03.046>.
49. Perlroth DJ, Glass RJ, Davey VJ, Cannon D, Garber AM, Owens DK. Health outcomes and costs of community mitigation strategies for an influenza pandemic in the United States. *Clin Infect Dis.* 2010;50(2):165–174. <https://doi.org/10.1086/649867>.
50. Michaelidis CI, Zimmerman RK, Nowalk MP, Smith KJ. Estimating the cost-effectiveness of a national program to eliminate disparities in influenza vaccination rates among elderly minority groups. *Vaccine.* 2011;29(19):3525–3530.  
<https://doi.org/10.1016/j.vaccine.2011.02.098>.



**Appendix**  
**The Benefits of Vaccinating With the First Available COVID-19 Coronavirus Vaccine**  
**Bartsch et al.**

51. Mauskopf JA, Cates SC, Griffin AD, Neighbors DM, Lamb SC, Rutherford C. Cost effectiveness of zanamivir for the treatment of influenza in a high risk population in Australia. *Pharmacoeconomics*. 2000;17(6):611–620. <https://doi.org/10.2165/00019053-200017060-00007>.
52. Lee BY, Tai JHY, Bailey RR, Smith KJ, Nowalk AJ. Economics of influenza vaccine administration timing for children. *Am J Manag Care*. 2010;16(3):e75–e85.
53. Jit M, Cromer D, Baguelin M, Stowe J, Andrews N, Miller E. The cost-effectiveness of vaccinating pregnant women against seasonal influenza in England and Wales. *Vaccine*. 2010;29(1):115–122. <https://doi.org/10.1016/j.vaccine.2010.08.078>.
54. Jiang Y, Yang X, Taniguchi K, Petigara T, Abe M. A cost-effectiveness analysis of revaccination and catch-up strategies with the 23-valent pneumococcal polysaccharide vaccine (PPV23) in older adults in Japan. *J Med Econ*. 2018;21(7):687–697. <https://doi.org/10.1080/13696998.2018.1465272>.
55. Kotirum S, Muangchana C, Techathawat S, Dilokthornsakul P, Wu DB-C, Chaiyakunapruk N. Economic evaluation and budget impact analysis of vaccination against haemophilus influenzae type b infection in Thailand. *Front Public Health*. 2017;5:289. <https://doi.org/10.3389/fpubh.2017.00289>.
56. Lapointe-Shaw L, Voruganti T, Kohler P, Thein H-H, Sander B, McGeer A. Cost-effectiveness analysis of universal screening for carbapenemase-producing Enterobacteriaceae in hospital inpatients. *Eur J Clin Microbiol Infect Dis*. 2017;36(6):1047–1055. <https://doi.org/10.1007/s10096-016-2890-7>.

**Appendix**  
**The Benefits of Vaccinating With the First Available COVID-19 Coronavirus Vaccine**  
**Bartsch et al.**

57. Willem L, Blommaert A, Hanquet G, et al. Economic evaluation of pneumococcal vaccines for adults aged over 50 years in Belgium. *Hum Vaccin Immunother*. 2018;14(5):1218–1229. <https://doi.org/10.1080/21645515.2018.1428507>.
58. Wu D, Chaiyakunapruk N, Pratoomsot C, et al. Cost-utility analysis of antiviral use under pandemic influenza using a novel approach—linking pharmacology, epidemiology and health economics. *Epidemiol Infect*. 2018;146(4):496–507. <https://doi.org/10.1017/s0950268818000158>.
59. Beauchemin C, Letarte N, Mathurin K, Yelle L, Lachaine J. A global economic model to assess the cost-effectiveness of new treatments for advanced breast cancer in Canada. *J Med Econ*. 2016;19(6):619–629. <https://doi.org/10.3111/13696998.2016.1151431>.
60. Fowler RA, Hill-Popper M, Stasinos J, Petrou C, Sanders GD, Garber AM. Cost-effectiveness of recombinant human activated protein C and the influence of severity of illness in the treatment of patients with severe sepsis. *J Crit Care*. 2003;18(3):181–191. <https://doi.org/10.1016/j.jcrc.2003.08.009>.
61. Huang DT, Clermont G, Dremsizov TT, Angus DC, Investigators P. Implementation of early goal-directed therapy for severe sepsis and septic shock: a decision analysis. *Crit Care Med*. 2007;35(9):2090–2100. <https://doi.org/10.1097/01.ccm.0000281636.82971.92>.
62. Kip MM, van Oers JA, Shajiei A, et al. Cost-effectiveness of procalcitonin testing to guide antibiotic treatment duration in critically ill patients: results from a randomised controlled multicentre trial in the Netherlands. *Crit Care*. 2018;22(1):1–10. <https://doi.org/10.1186/s13054-018-2234-3>.

**Appendix**  
**The Benefits of Vaccinating With the First Available COVID-19 Coronavirus Vaccine**  
**Bartsch et al.**

63. Lee BY, Wiringa AE, Bailey RR, Lewis GJ, Feura J, Muder RR. Staphylococcus aureus vaccine for orthopedic patients: an economic model and analysis. *Vaccine*. 2010;28(12):2465–2471. <https://doi.org/10.1016/j.vaccine.2009.12.075>.
64. Stevenson SM, Danzig MR, Ghandour RA, et al. Cost-effectiveness of neoadjuvant chemotherapy before radical cystectomy for muscle-invasive bladder cancer. *Urol Oncol*. 2014;32(8):1172–1177. <https://doi.org/10.1016/j.urolonc.2014.05.001>.
65. Wu DBC, Chaiyakunapruk N, Pratoomsot C, et al. Cost-utility analysis of antiviral use under pandemic influenza using a novel approach - linking pharmacology, epidemiology and health economics. *Epidemiol Infect*. 2018;146(4):496–507. <https://doi.org/10.1017/s0950268818000158>.
66. Coverage and Reimbursement of COVID-19 Vaccines, Vaccine Administration and Cost Sharing under Medicaid, the Children’s Health Insurance Program, and Basic Health Program. Baltimore, MD: Centers for Medicare & Medicaid Services October 29, 2020.
67. Biomedical Advanced Research and Development Authority (BARDA). BARDA’s Rapidly Expanding: COVID-19 Medical Countermeasure Portfolio. <https://www.medicalcountermeasures.gov/app/barda/coronavirus/COVID19.aspx?filter=vaccine>. Published November 11, 2020. Accessed November 12, 2020.
